# Supplementary material for: An In Silico Deep Learning Approach to Multi-Epitope Vaccine Design: A Hepatitis E Virus Case Study
Source: MDPI journal article supplement (doi:10.3390/vaccines11030710), 2023-03-22
Supplement: s1 [file s1]

# Supplementary Table S1: Conserved regions of ORF2

Seventeen conserved regions in ORF2 of HEV

|                                                      |     |
|------------------------------------------------------|-----|
| GQPSGRRRGRRSGG                                       | 22  |
| GGGFWGDRVDSQPFA                                      | 37  |
| PYIHPTNPFA                                           | 54  |
| RPLGSAWRDQ                                           | 80  |
| PVPDVDSRGAILRRQYNLSTSPLTS                            | 120 |
| GTNLVLYAAPL                                          | 149 |
| PLLPLQDGTNTHIMATEASNYAQYRV                           | 161 |
| ATIRYRPLVPNAVGGYAISISFWPQTTTTPTSVDMSITSTDVRILVQPGIAS | 188 |
| ELVIPSERLHYRNQGWRSVET                                |     |
| GVAEEEEATSGLVMLCIHGSPVNSYTNTPYTGALGLLDFALELEFRNLTPGN | 264 |
| TNTRVSRV                                             |     |
| DGTAELTTAATRFMKDL                                    | 335 |
| GIALTLFNLADTLLGGLPTELISSAGGQLFYSRPVVSANGEPTVKLYTSVEN | 366 |
| AQQDKGI                                              |     |
| RVVIQDYDNQHEQDRPTSPAPSRPFSVLRANDVLWLSLTAAEYDQ        | 436 |
| KVTLDGRPL                                            | 517 |
| TIQQYSKTF                                            | 527 |
| VLPLRGKLSFWEAGTTKAGYPYNYNTTASDQ                      | 537 |
| DYPARAHTFDDFCPECR                                    | 614 |
| AELQRLKMKVGKTRE                                      | 644 |

# Supplementary Table S2: Search theme: Words for data mining antigenic regions of HEV

|                                          |
|------------------------------------------|
| HEV antigenic epitope                    |
| HEV epitopes                             |
| Immunogenic regions of HEV               |
| Vaccine regions of HEV                   |
| Experimentally validated epitopes of HEV |
| Position of epitopes in HEV              |
